# Supplementary material
Source: MDPI journal article supplement (https://www.mdpi.com/2073-4344/13/1/82)
Supplement: s1 [file s1]

# Nickel Catalysts on Carbon-Mineral Sapropel-Based Supports for Liquid-Phase Hydrogenation of Nitrobenzene

Elena N. Terekhova <sup>1</sup>, Olga B. Belskaya <sup>1,\*</sup>, Rinat R. Izmaylov <sup>1</sup>, Mikhail V. Trenikhin <sup>1</sup>  
and Vladimir A. Likholobov <sup>2</sup>

<sup>1</sup> Center of New Chemical Technologies, Boreskov Institute of Catalysis, 54 Neftezhavodskaya Street, 644040 Omsk, Russia

<sup>2</sup> Boreskov Institute of Catalysis, Siberian Branch, Russian Academy of Sciences, 5 Acad. Lavrentieva Ave., 630090 Novosibirsk, Russia

\* Correspondence: obelska@ihcp.ru; Tel.: +7-(3812)-670-474

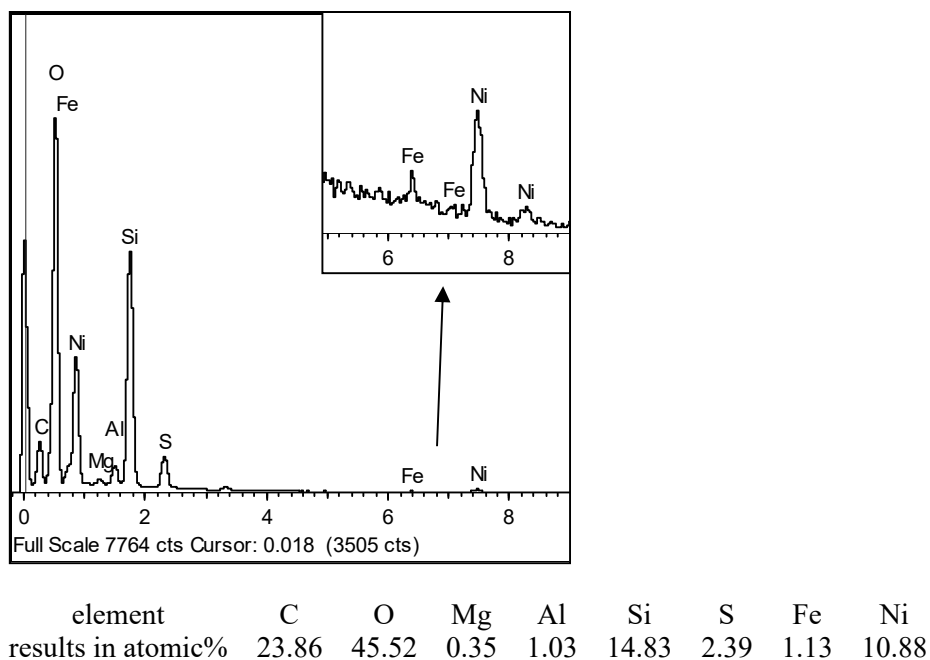

**Figure S1.** EDX spectra and atomic % of elements in sample Ni/CM-M, formate.

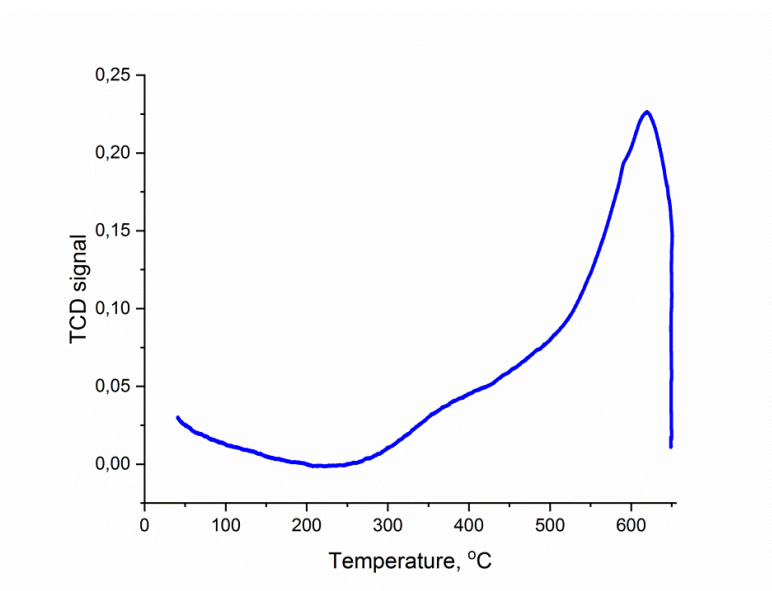

**Figure S2.** TPR profile of CMM support.

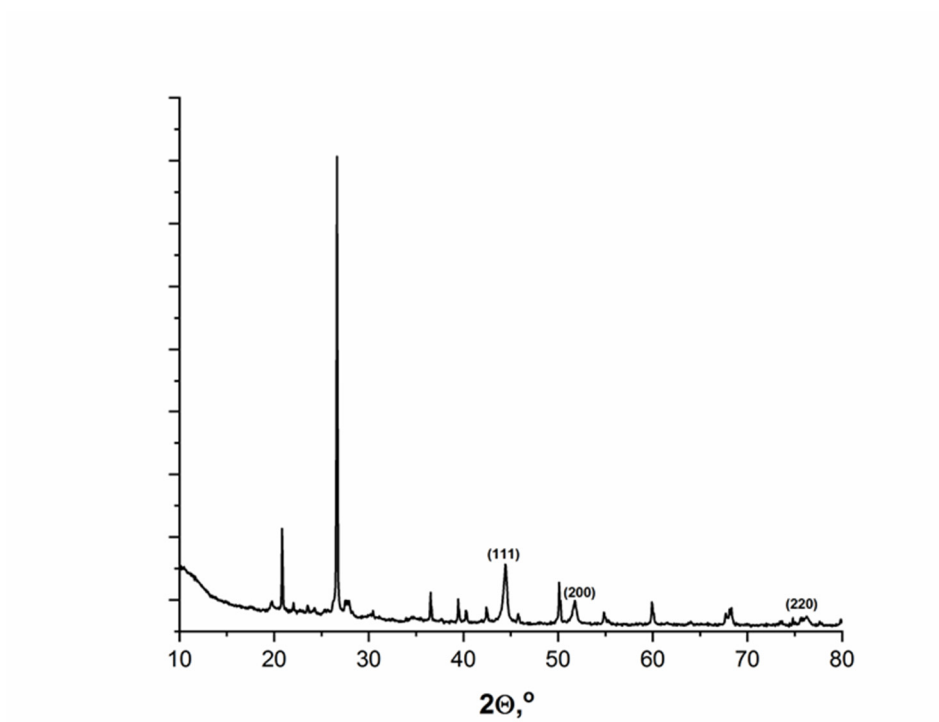

**Figure S3.** Diffraction patterns of Ni/CM-M sample reduced at 600 °C with  $\text{Ni}(\text{NO}_3)_2$  as a precursor. Reflections associated with the nickel metal phase are noted.

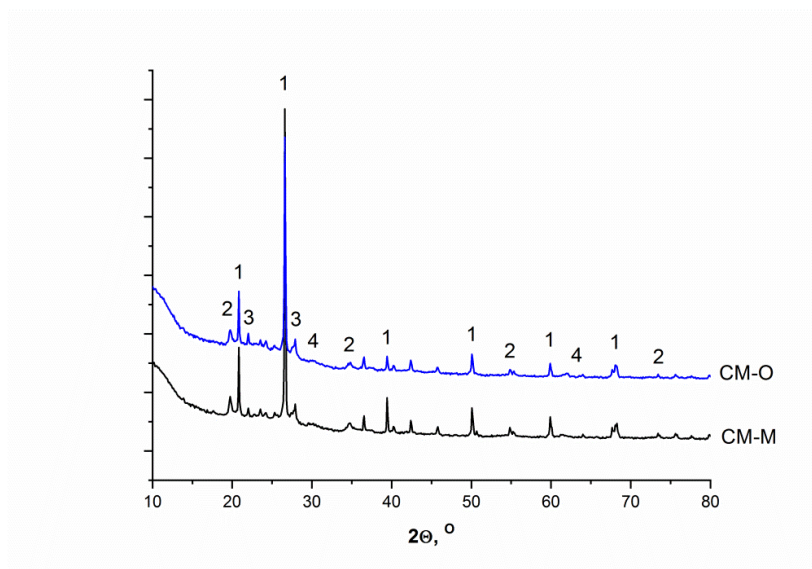

**Figure S4.** Diffraction patterns of CM-M and CM-O samples (1 – SiO<sub>2</sub>, PDF # 01-070-3755, 2-muscovite KAl<sub>2</sub>(Si<sub>3</sub>Al)O<sub>10</sub>(OH)<sub>2</sub>, PDF #00-007-0025, 3 - albite (Na<sub>0.84</sub>Ca<sub>0.16</sub>)Al<sub>1.16</sub>Si<sub>2.84</sub>O<sub>8</sub>, PDF # 01-076-0927, 4 - microcline (K<sub>0.95</sub>Na<sub>0.05</sub>)AlSi<sub>3</sub>O<sub>8</sub>, PDF # 01-084-1455).

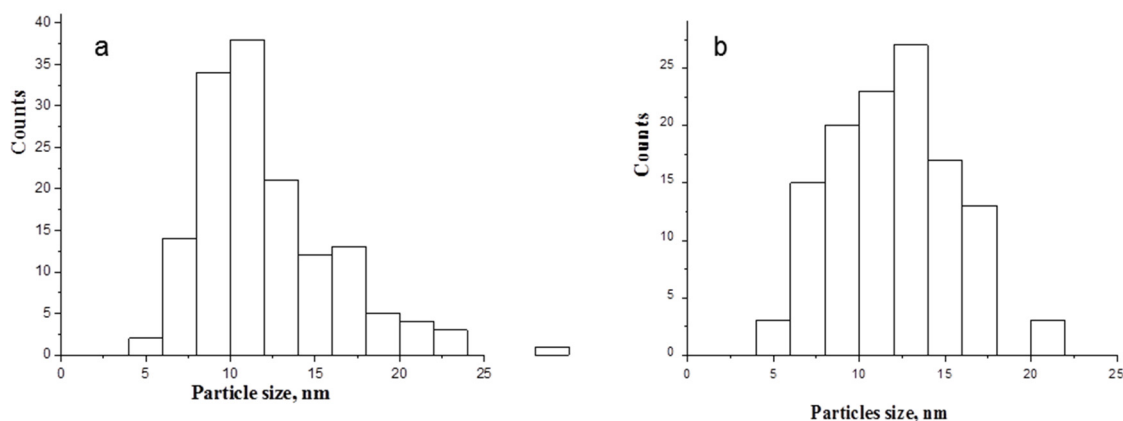

**Figure S5.** Size distribution of nickel particles from TEM data: a – Ni/CM-M, nitrate; b – Ni/CM-M, formate.

On figure S5 histograms are presented for samples prepared using the same support CM-M but different nickel precursors, nitrate and formate. It follows from these data that a fairly uniform distribution is formed, and the average particle size for these catalysts is close (11.8–12.1 nm). The closeness of the sizes of supported nickel for these samples is consistent with the XRD data.

It should be noted that it is not always possible to obtain correct data on the particle size distribution, since the carbon-mineral support from sapropel contains high-density mineral components and it is difficult to identify particles of the introduced metal. In samples obtained from nickel sulfate, a new phase is formed, which also does not allow one to determine the size of nickel particles correctly from TEM data.

**Table S1.** The comparison of the studied catalysts activity with other catalysts in the reaction of liquid-phase nitrobenzene hydrogenation

| No | Catalyst                               | Reaction conditions                                       | Conversion, % | Selectivity for aniline, % | Reference                                                                                                                                                |
|----|----------------------------------------|-----------------------------------------------------------|---------------|----------------------------|----------------------------------------------------------------------------------------------------------------------------------------------------------|
| 1  | Pd/carbon foam                         | P(H <sub>2</sub> )=2 MPa, T=10-50°C, 5-240 min, methanol  | 99.1          | 99.8                       | <i>Int. J. Mol. Sci.</i> <b>2022</b> , 23(12), 6423;<br><a href="https://doi.org/10.3390/ijms23126423">https://doi.org/10.3390/ijms23126423</a>          |
| 2  | Pd/MnFe <sub>2</sub> O <sub>4</sub>    | P(H <sub>2</sub> )= 2 MPa, 40-180 min, 10-50 °C, methanol | 96            | 96                         | <i>Int. J. Mol. Sci.</i> <b>2022</b> , 23(12), 6535;<br><a href="https://doi.org/10.3390/ijms23126535">https://doi.org/10.3390/ijms23126535</a>          |
| 3  | Palladium-containing anion exchangers  | P(H <sub>2</sub> ) = 0.1 MPa, 20°C, ethanol               | ≥99           | ≥99                        | <i>Petrol Chem.</i> <b>2016</b> , 56 (2), 146-150<br>DOI: <a href="https://doi.org/10.1134/S096554411602002X">10.1134/S096554411602002X</a>              |
| 4  | Ru/MN270 (hypercroslinked polystyrene) | P(H <sub>2</sub> )=0.2 MPa, 180 °C, 30 min, i-propanol    | 97            | 98                         | <i>Bulletin of Science and Practice</i> <b>2018</b> , 4(12)<br><a href="http://doi.org/10.5281/zenodo.2254348">http://doi.org/10.5281/zenodo.2254348</a> |
| 5  | Ru/fulleride nanospheres C60           | P(H <sub>2</sub> )=3 MPa, 80 °C, 240 min, ethanol         | ≥99           | 90                         | <i>ACS Catal.</i> <b>2016</b> , 6, 6018–6024<br>DOI: 10.1021/acscatal.6b01429                                                                            |
| 6  | Pd/carbon nanoglobules                 | P(H <sub>2</sub> )=0.5 MPa, 50 °C, 60 min, ethanol        | ≥99           | ≥99                        | <i>Catalysis Letters</i> <b>2020</b> , 150 (3), 888-900<br>DOI: <a href="https://doi.org/10.1007/s10562-019-02974-6">10.1007/s10562-019-02974-6</a>      |
| 7  | Ni/TiO <sub>2</sub>                    | P(H <sub>2</sub> )= 1.96 MPa, 140 °C, 60 min,             | 60            | ≥99                        | <i>Chinese J Catal</i> <b>2012</b> , 33 (8),<br>DOI: 10.1016/S1872-                                                                                      |

|    |                                     |                                                                                |       |       |                                                                                                                                                                                           |
|----|-------------------------------------|--------------------------------------------------------------------------------|-------|-------|-------------------------------------------------------------------------------------------------------------------------------------------------------------------------------------------|
|    |                                     | ethanol                                                                        |       |       | 2067(11)60398-7                                                                                                                                                                           |
| 8  | Ni/Fullerene C60                    | P(H <sub>2</sub> )=1 MPa, 80 °C 20 min, ethanol                                | 99.5  | ≥99.9 | <a href="#">Chemical Engineering Journal</a> , <b>2020</b> , <i>382</i> (15),122911.<br><a href="https://doi.org/10.1016/j.cej.2019.122911">https://doi.org/10.1016/j.cej.2019.122911</a> |
| 9  | Ni/γ-Al <sub>2</sub> O <sub>3</sub> | P(H <sub>2</sub> )=4 – 8 MPa, 50 or 80 °C, 50 min Ethanol or scCO <sub>2</sub> | 13-73 | 62-99 | <a href="#">Journal of Catalysis</a> <b>2009</b> , 264 (1), 1-10.<br><a href="https://doi.org/10.1016/j.jcat.2009.03.008">https://doi.org/10.1016/j.jcat.2009.03.008</a>                  |
| 10 | Ni/CM-M                             | P(H <sub>2</sub> )=2 MPa, T=90 °C, 60 min, ethanol                             | 65    | ≥99   | This work                                                                                                                                                                                 |

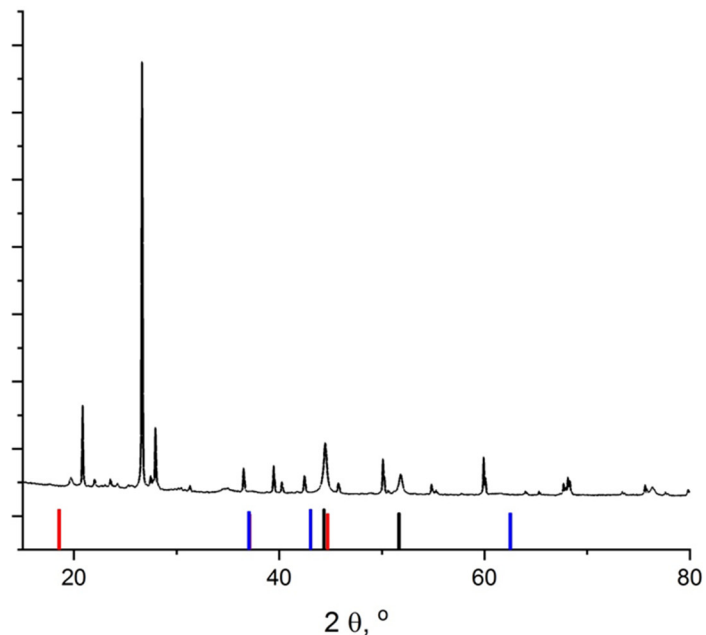

**Figure S6.** Diffraction patterns of Ni/CM-M sample reduced at 350 °C (red line - basic reflections of NiO<sub>2</sub>, PDF # 01-085-1977; black line – basic reflections of Ni, PDF # 03-065-380, blue line – basic reflections of NiO, PDF # 01-071-4750).

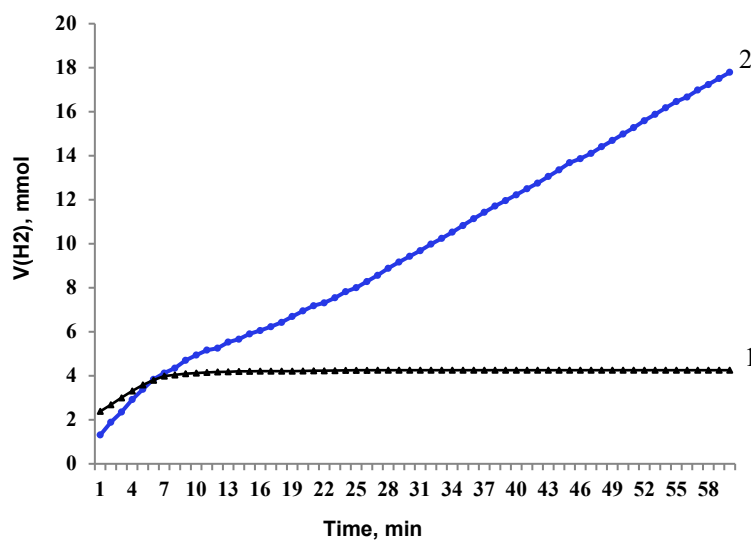

**Figure S7.** Hydrogen absorption curves for hydrogenation of nitrobenzene on Ni/CM-M with nickel nitrate as a precursor, reduced at: 1 - 350 °C, 2 – 650 °C (the reaction conditions: hydrogen pressure 2 MPa, temperature 90 °C, and time 60 min).

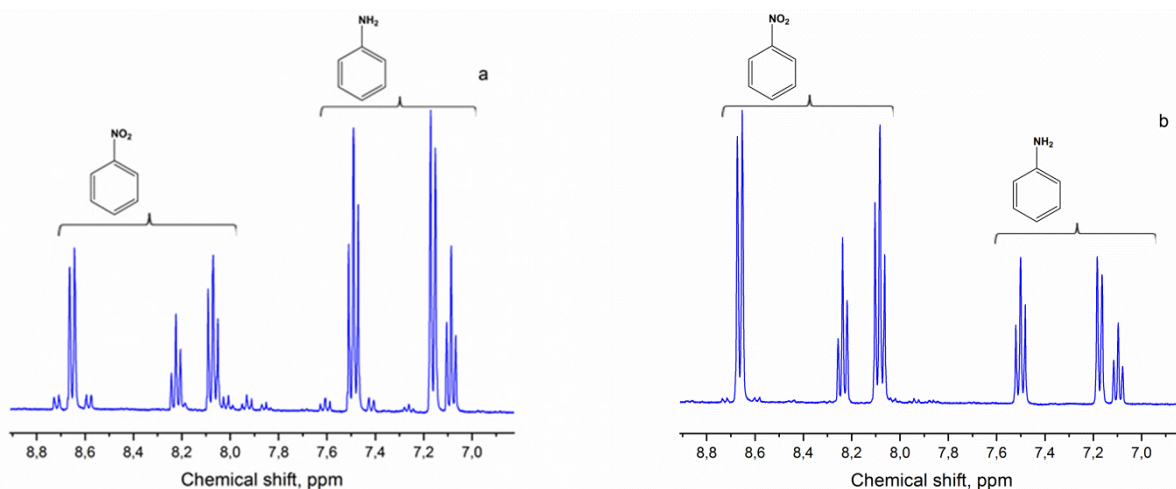

**Figure S8.** NMR (<sup>1</sup>H) spectra of nitrobenzene hydrogenation reaction products using nickel catalysts based on sapropels of various nature with Ni(NO<sub>3</sub>)<sub>2</sub> as a precursor (a – Ni/CM-M, b – Ni/CM-O).

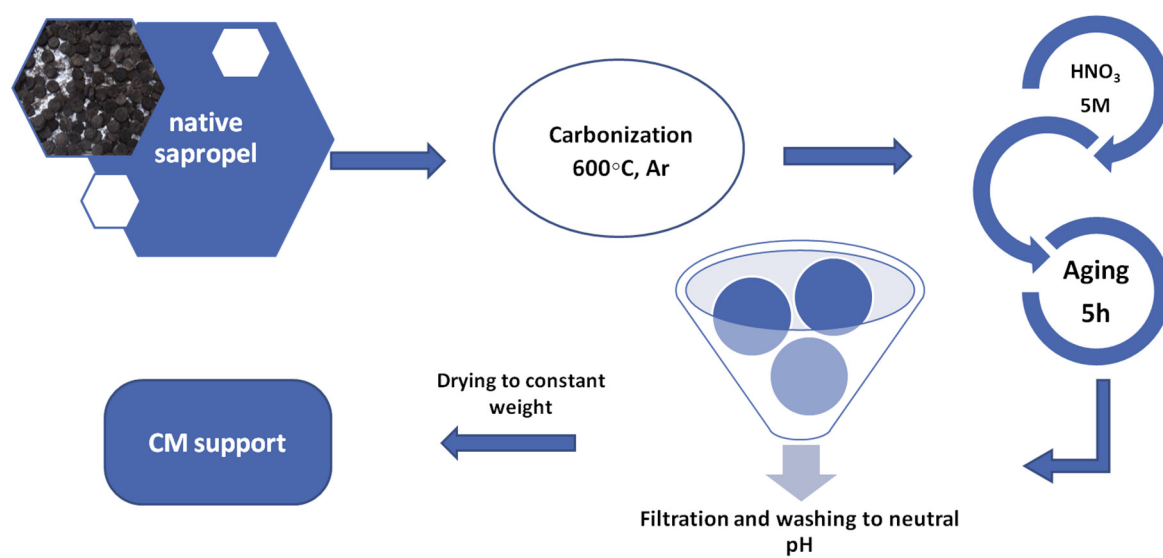

**Figure S9.** Scheme for the synthesis of CM support from sapropel.
